# Supplementary material for: The C‐terminal extension of VgrG4 from Klebsiella pneumoniae remodels host cell microfilaments
Source: PubMed Central journal article supplement — Proteins. 2022 Apr 28;90(9):1655–68. doi: 10.1002/prot.26344 (PMC9542434; doi:10.1002/prot.26344), 2022-04-28
Supplement: PROT-90-1655-s001.pdf [file PROT-90-1655-s001.pdf]

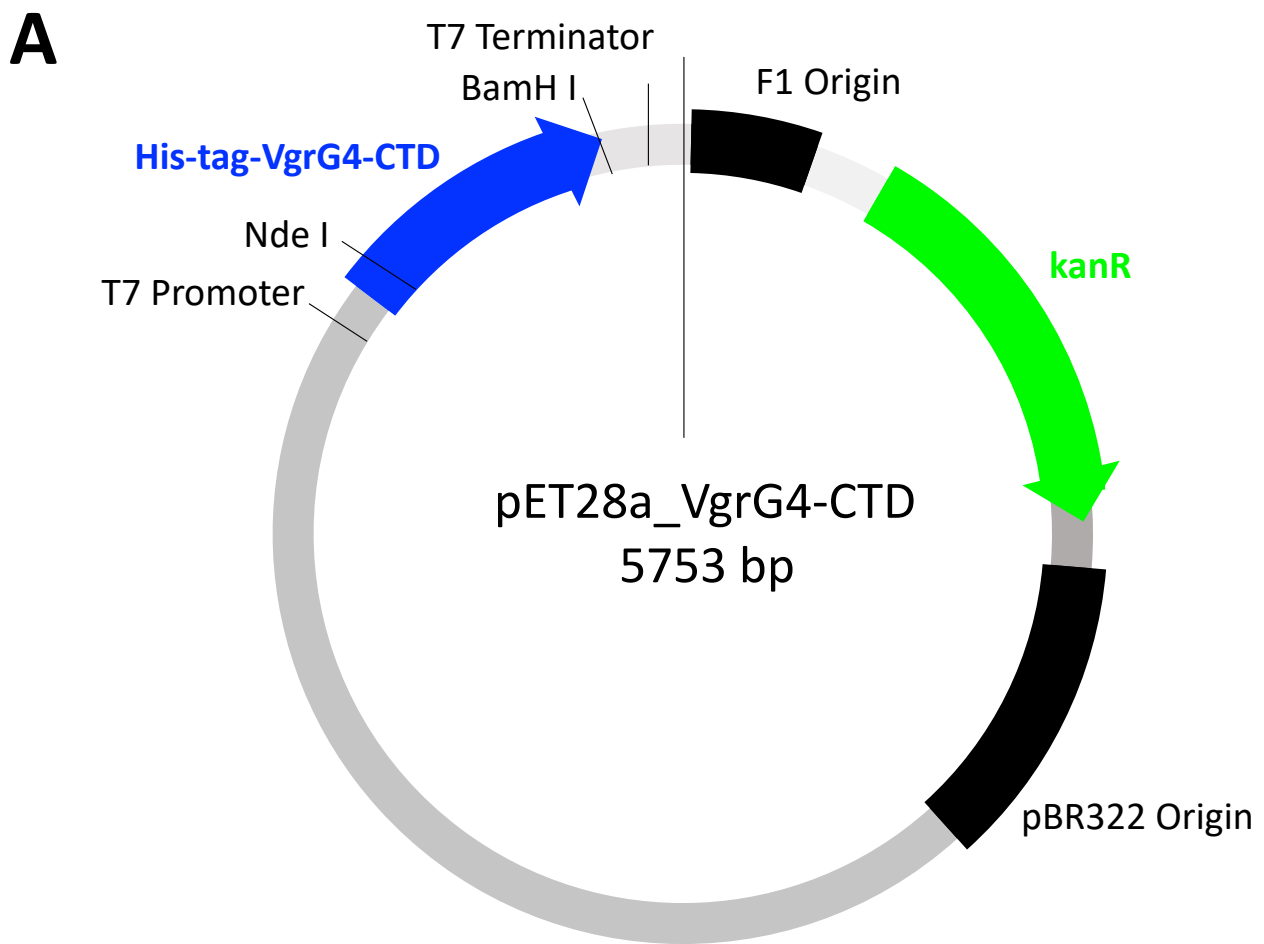

**B**

```

1   MGSSHHHHHHSSGLVPRGSHMKADHPDYPPLQSTVQRQSLKLNVA   44
45  QSPNASDSSWAGMPYTLYADGALLKQGVLDERQGISVDHQVVTR   88
89  SYKLEMANGVSYQIPVAEAYSRPEQGELANRGFHHHTSQAASDI   132
133 NPPSSHTEHRNTYADLLDGHIEQDESQ

```

**Supplementary Figure 1: Recombinant VgrG4CTD.**

A) Schematic representation of the plasmid used for the recombinant protein expression. B) RecombinantVgrG4-CTD primary sequence. The histidine tag and the thrombin recognition site are shadowed in gray.

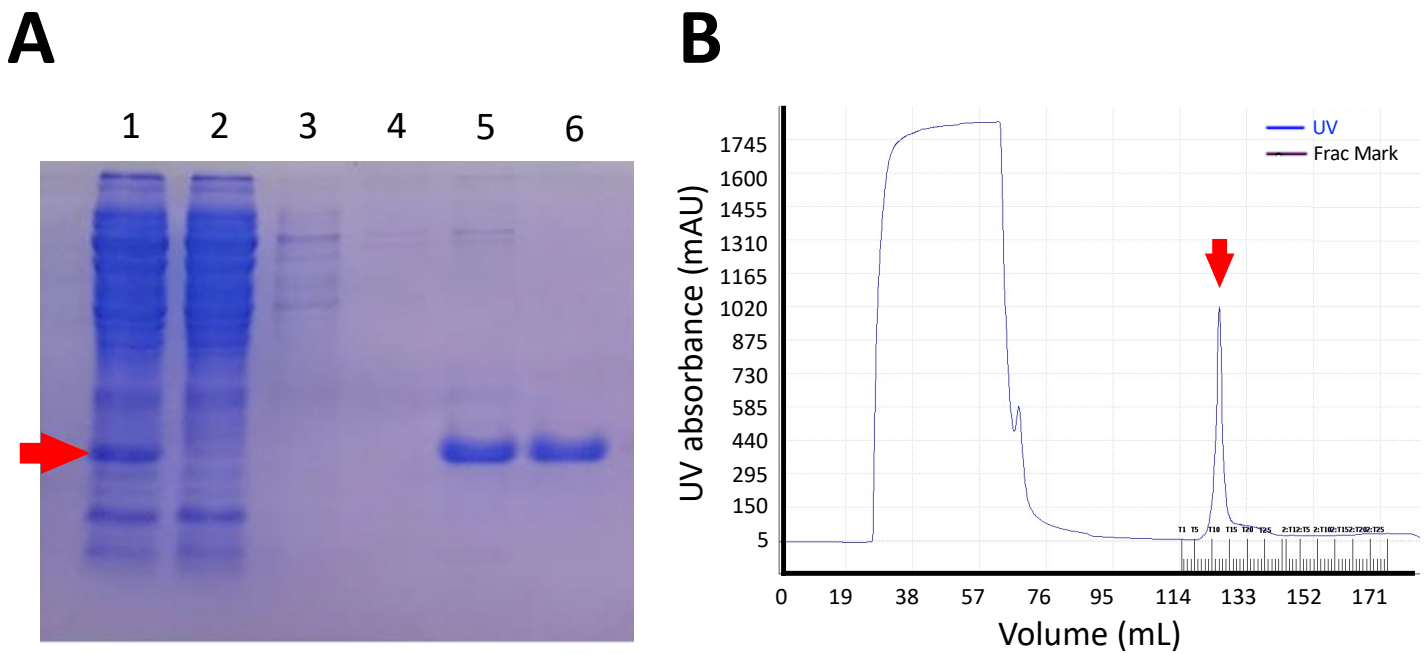

**Supplementary Figure 2: VgrG4-CTD purification on a nickel affinity column.**

A) Polyacrylamide electrophoresis showing: (1) protein profile of *E. coli* expressing VgrG4-CTD; (2) non-bound fraction; (3 and 4) column washings; and (5 and 6) VgrG4-CTD eluted in 500 mM imidazole buffer. B) Chromatographic profile of VgrG4-CTD in a nickel affinity column. The red arrows point to VgrG4-CTD band and peak.

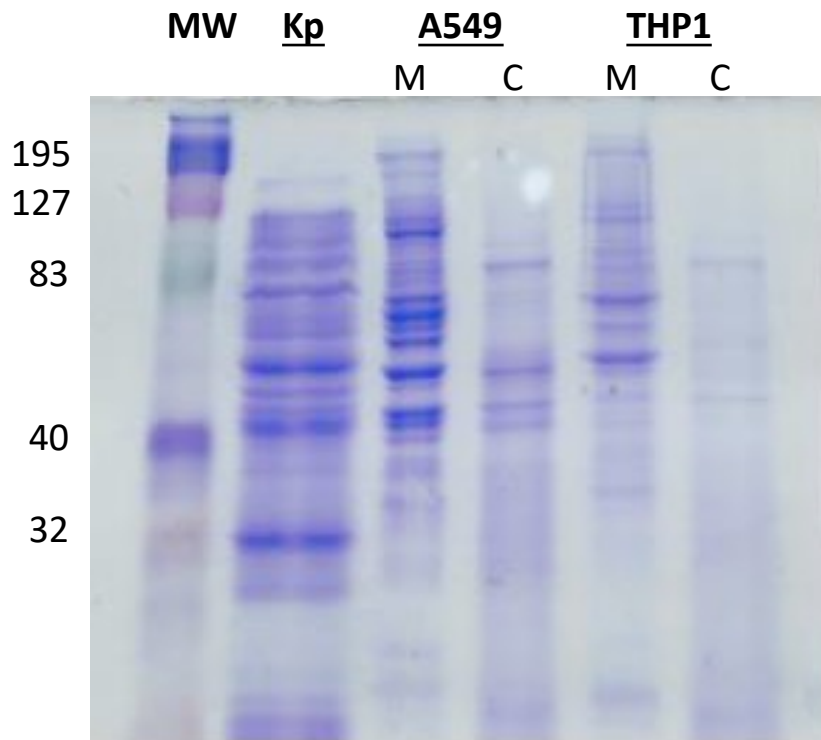

**Supplementary Figure 3:** Protein profile of the cell lysates used in pulldown experiments. M: membrane-enriched fractions, C: soluble fractions. The molecular weights of the Kaleidoscope prestained protein standard (Biorad) are shown in kDa.

**Table S1: Putative VgrG4-CTD ligands identified in lung epithelial cells (A549) soluble fraction**

|    | Accession   | Score | Mass   | N° of matches | N° of significant matches | N° of sequences | N° of significant sequences | emPAI | Description                                                                   |
|----|-------------|-------|--------|---------------|---------------------------|-----------------|-----------------------------|-------|-------------------------------------------------------------------------------|
| 1  | MYH9_HUMAN  | 1005  | 227646 | 32            | 28                        | 28              | 25                          | 0.52  | Myosin-9 OS=Homo sapiens GN=MYH9 PE=1 SV=4                                    |
| 2  | TBB5_HUMAN  | 846   | 50095  | 17            | 17                        | 11              | 11                          | 1.55  | Tubulin beta chain OS=Homo sapiens GN=TUBB PE=1 SV=2                          |
| 3  | TBA1C_HUMAN | 502   | 50548  | 16            | 16                        | 13              | 13                          | 1.53  | Tubulin alpha-1C chain OS=Homo sapiens GN=TUBA1C PE=1 SV=1                    |
| 4  | ANXA2_HUMAN | 413   | 38808  | 11            | 11                        | 9               | 9                           | 1.52  | Annexin A2 OS=Homo sapiens GN=ANXA2 PE=1 SV=2                                 |
| 5  | ACTB_HUMAN  | 372   | 42052  | 14            | 14                        | 8               | 8                           | 1.35  | Actin, cytoplasmic 1 OS=Homo sapiens GN=ACTB PE=1 SV=1                        |
| 6  | FLNA_HUMAN  | 348   | 283301 | 14            | 11                        | 13              | 10                          | 0.14  | Filamin-A OS=Homo sapiens GN=FLNA PE=1 SV=4                                   |
| 7  | EF2_HUMAN   | 205   | 96246  | 9             | 9                         | 8               | 8                           | 0.35  | Elongation factor 2 OS=Homo sapiens GN=EEF2 PE=1 SV=4                         |
| 8  | RLA2_HUMAN  | 146   | 11658  | 5             | 5                         | 3               | 3                           | 1.41  | 60S acidic ribosomal protein P2 OS=Homo sapiens GN=RPLP2 PE=1 SV=1            |
| 9  | 1433T_HUMAN | 144   | 28032  | 3             | 3                         | 2               | 2                           | 0.29  | 14-3-3 protein theta OS=Homo sapiens GN=YWHAQ PE=1 SV=1                       |
| 10 | ACTN4_HUMAN | 139   | 105245 | 3             | 3                         | 2               | 2                           | 0.07  | Alpha-actinin-4 OS=Homo sapiens GN=ACTN4 PE=1 SV=2                            |
| 11 | RLA1_HUMAN  | 123   | 11621  | 3             | 3                         | 2               | 2                           | 0.8   | 60S acidic ribosomal protein P1 OS=Homo sapiens GN=RPLP1 PE=1 SV=1            |
| 12 | NOLC1_HUMAN | 116   | 73560  | 2             | 2                         | 1               | 1                           | 0.05  | Nucleolar and coiled-body phosphoprotein 1 OS=Homo sapiens GN=NOLC1 PE=1 SV=2 |
| 13 | K2C8_HUMAN  | 114   | 53671  | 3             | 3                         | 3               | 3                           | 0.22  | Keratin, type II cytoskeletal 8 OS=Homo sapiens GN=KRT8 PE=1 SV=7             |
| 14 | RL7A_HUMAN  | 113   | 30148  | 4             | 4                         | 3               | 3                           | 0.42  | 60S ribosomal protein L7a OS=Homo sapiens GN=RPL7A PE=1 SV=2                  |
| 15 | RS8_HUMAN   | 106   | 24475  | 4             | 3                         | 3               | 2                           | 0.34  | 40S ribosomal protein S8 OS=Homo sapiens GN=RPS8 PE=1 SV=2                    |
| 16 | RS5_HUMAN   | 104   | 23033  | 3             | 3                         | 2               | 2                           | 0.36  | 40S ribosomal protein S5 OS=Homo sapiens GN=RPS5 PE=1 SV=4                    |
| 17 | RL27A_HUMAN | 102   | 16665  | 1             | 1                         | 1               | 1                           | 0.23  | 60S ribosomal protein L27a OS=Homo sapiens GN=RPL27A PE=1 SV=2                |
| 18 | RL18_HUMAN  | 98    | 21735  | 2             | 1                         | 2               | 1                           | 0.18  | 60S ribosomal protein L18 OS=Homo sapiens GN=RPL18 PE=1 SV=2                  |
| 19 | RL14_HUMAN  | 95    | 23531  | 2             | 2                         | 2               | 2                           | 0.35  | 60S ribosomal protein L14 OS=Homo sapiens GN=RPL14 PE=1 SV=4                  |
| 20 | NPM_HUMAN   | 92    | 32726  | 2             | 2                         | 2               | 2                           | 0.24  | Nucleophosmin OS=Homo sapiens GN=NPM1 PE=1 SV=2                               |
| 21 | RS18_HUMAN  | 87    | 17708  | 4             | 4                         | 3               | 3                           | 0.81  | 40S ribosomal protein S18 OS=Homo sapiens GN=RPS18 PE=1 SV=3                  |
| 22 | HS90B_HUMAN | 86    | 83554  | 9             | 4                         | 7               | 3                           | 0.14  | Heat shock protein HSP 90-beta OS=Homo sapiens GN=HSP90AB1 PE=1 SV=4          |
| 23 | HSPB1_HUMAN | 83    | 22826  | 3             | 2                         | 3               | 2                           | 0.36  | Heat shock protein beta-1 OS=Homo sapiens GN=HSPB1 PE=1 SV=2                  |

|    |             |    |        |   |   |   |   |      |                                                                                               |
|----|-------------|----|--------|---|---|---|---|------|-----------------------------------------------------------------------------------------------|
| 24 | RS2_HUMAN   | 80 | 31590  | 2 | 2 | 2 | 2 | 0.25 | 40S ribosomal protein S2 OS=Homo sapiens GN=RPS2 PE=1 SV=2                                    |
| 25 | RL6_HUMAN   | 72 | 32765  | 3 | 3 | 3 | 3 | 0.39 | 60S ribosomal protein L6 OS=Homo sapiens GN=RPL6 PE=1 SV=3                                    |
| 26 | CALM1_HUMAN | 70 | 16827  | 1 | 1 | 1 | 1 | 0.23 | Calmodulin-1 OS=Homo sapiens GN=CALM1 PE=1 SV=1                                               |
| 27 | ML12A_HUMAN | 67 | 19839  | 2 | 2 | 1 | 1 | 0.19 | Myosin regulatory light chain 12A OS=Homo sapiens GN=MYL12A PE=1 SV=2                         |
| 28 | RS16_HUMAN  | 65 | 16549  | 3 | 2 | 3 | 2 | 0.52 | 40S ribosomal protein S16 OS=Homo sapiens GN=RPS16 PE=1 SV=2                                  |
| 29 | TEBP_HUMAN  | 64 | 18971  | 3 | 2 | 3 | 2 | 0.45 | Prostaglandin E synthase 3 OS=Homo sapiens GN=PTGES3 PE=1 SV=1                                |
| 30 | RLA0L_HUMAN | 63 | 34514  | 2 | 2 | 2 | 2 | 0.23 | 60S acidic ribosomal protein P0-like OS=Homo sapiens GN=RPLP0P6 PE=5 SV=1                     |
| 31 | LDHA_HUMAN  | 62 | 36950  | 4 | 3 | 4 | 3 | 0.34 | L-lactate dehydrogenase A chain OS=Homo sapiens GN=LDHA PE=1 SV=2                             |
| 32 | TCP4_HUMAN  | 56 | 14386  | 2 | 2 | 2 | 2 | 0.62 | Activated RNA polymerase II transcriptional coactivator p15 OS=Homo sapiens GN=SUB1 PE=1 SV=3 |
| 33 | RS7_HUMAN   | 56 | 22113  | 3 | 3 | 3 | 3 | 0.61 | 40S ribosomal protein S7 OS=Homo sapiens GN=RPS7 PE=1 SV=1                                    |
| 34 | RL30_HUMAN  | 53 | 12947  | 1 | 1 | 1 | 1 | 0.3  | 60S ribosomal protein L30 OS=Homo sapiens GN=RPL30 PE=1 SV=2                                  |
| 35 | RL18A_HUMAN | 52 | 21034  | 1 | 1 | 1 | 1 | 0.18 | 60S ribosomal protein L18a OS=Homo sapiens GN=RPL18A PE=1 SV=2                                |
| 36 | RL3_HUMAN   | 52 | 46365  | 2 | 2 | 1 | 1 | 0.08 | 60S ribosomal protein L3 OS=Homo sapiens GN=RPL3 PE=1 SV=2                                    |
| 37 | FAS_HUMAN   | 49 | 275877 | 1 | 1 | 1 | 1 | 0.01 | Fatty acid synthase OS=Homo sapiens GN=FASN PE=1 SV=3                                         |
| 38 | RS3_HUMAN   | 48 | 26842  | 1 | 1 | 1 | 1 | 0.14 | 40S ribosomal protein S3 OS=Homo sapiens GN=RPS3 PE=1 SV=2                                    |
| 39 | AK1C1_HUMAN | 45 | 37221  | 1 | 1 | 1 | 1 | 0.1  | Aldo-keto reductase family 1 member C1 OS=Homo sapiens GN=AKR1C1 PE=1 SV=1                    |
| 40 | TGM2_HUMAN  | 43 | 78420  | 1 | 1 | 1 | 1 | 0.05 | Protein-glutamine gamma-glutamyltransferase 2 OS=Homo sapiens GN=TGM2 PE=1 SV=2               |
| 41 | RL12_HUMAN  | 43 | 17979  | 2 | 2 | 2 | 2 | 0.48 | 60S ribosomal protein L12 OS=Homo sapiens GN=RPL12 PE=1 SV=1                                  |
| 42 | KRT81_HUMAN | 42 | 56832  | 1 | 1 | 1 | 1 | 0.07 | Keratin, type II cuticular Hb1 OS=Homo sapiens GN=KRT81 PE=1 SV=3                             |
| 43 | PRDX1_HUMAN | 42 | 22324  | 1 | 1 | 1 | 1 | 0.17 | Peroxiredoxin-1 OS=Homo sapiens GN=PRDX1 PE=1 SV=1                                            |
| 44 | RS19_HUMAN  | 40 | 16051  | 2 | 2 | 2 | 2 | 0.54 | 40S ribosomal protein S19 OS=Homo sapiens GN=RPS19 PE=1 SV=2                                  |
| 45 | RL5_HUMAN   | 40 | 34569  | 2 | 2 | 1 | 1 | 0.11 | 60S ribosomal protein L5 OS=Homo sapiens GN=RPL5 PE=1 SV=3                                    |
| 46 | MYL6_HUMAN  | 40 | 17090  | 2 | 1 | 2 | 1 | 0.23 | Myosin light polypeptide 6 OS=Homo sapiens GN=MYL6 PE=1 SV=2                                  |
| 47 | RACK1_HUMAN | 39 | 35511  | 1 | 1 | 1 | 1 | 0.11 | Receptor of activated protein C kinase 1 OS=Homo sapiens GN=RACK1 PE=1 SV=3                   |
| 48 | ALBU_HUMAN  | 38 | 71317  | 2 | 1 | 2 | 1 | 0.05 | Serum albumin OS=Homo sapiens GN=ALB PE=1 SV=2                                                |
| 49 | RL7_HUMAN   | 36 | 29264  | 1 | 1 | 1 | 1 | 0.13 | 60S ribosomal protein L7 OS=Homo sapiens GN=RPL7 PE=1 SV=1                                    |
| 50 | NUCL_HUMAN  | 36 | 76625  | 2 | 1 | 2 | 1 | 0.05 | Nucleolin OS=Homo sapiens GN=NCL PE=1 SV=3                                                    |

|    |             |    |       |   |   |   |   |      |                                                                             |
|----|-------------|----|-------|---|---|---|---|------|-----------------------------------------------------------------------------|
| 51 | RS3A_HUMAN  | 36 | 30154 | 2 | 1 | 2 | 1 | 0.13 | 40S ribosomal protein S3a OS=Homo sapiens GN=RPS3A PE=1 SV=2                |
| 52 | RS13_HUMAN  | 34 | 17212 | 1 | 1 | 1 | 1 | 0.23 | 40S ribosomal protein S13 OS=Homo sapiens GN=RPS13 PE=1 SV=2                |
| 53 | RS9_HUMAN   | 34 | 22635 | 2 | 2 | 2 | 2 | 0.37 | 40S ribosomal protein S9 OS=Homo sapiens GN=RPS9 PE=1 SV=3                  |
| 54 | RL22_HUMAN  | 33 | 14835 | 1 | 1 | 1 | 1 | 0.26 | 60S ribosomal protein L22 OS=Homo sapiens GN=RPL22 PE=1 SV=2                |
| 55 | RL4_HUMAN   | 33 | 47953 | 2 | 2 | 2 | 2 | 0.16 | 60S ribosomal protein L4 OS=Homo sapiens GN=RPL4 PE=1 SV=5                  |
| 56 | RL8_HUMAN   | 32 | 28235 | 1 | 1 | 1 | 1 | 0.13 | 60S ribosomal protein L8 OS=Homo sapiens GN=RPL8 PE=1 SV=2                  |
| 57 | H2B1A_HUMAN | 31 | 14159 | 1 | 1 | 1 | 1 | 0.28 | Histone H2B type 1-A OS=Homo sapiens GN=HIST1H2BA PE=1 SV=3                 |
| 58 | RL24_HUMAN  | 31 | 17882 | 2 | 2 | 2 | 2 | 0.48 | 60S ribosomal protein L24 OS=Homo sapiens GN=RPL24 PE=1 SV=1                |
| 59 | RS4X_HUMAN  | 29 | 29807 | 3 | 1 | 3 | 1 | 0.13 | 40S ribosomal protein S4, X isoform OS=Homo sapiens GN=RPS4X PE=1 SV=2      |
| 60 | G3P_HUMAN   | 28 | 36201 | 1 | 1 | 1 | 1 | 0.1  | Glyceraldehyde-3-phosphate dehydrogenase OS=Homo sapiens GN=GAPDH PE=1 SV=3 |
| 61 | RL23A_HUMAN | 27 | 17684 | 1 | 1 | 1 | 1 | 0.22 | 60S ribosomal protein L23a OS=Homo sapiens GN=RPL23A PE=1 SV=1              |
| 62 | H2A1B_HUMAN | 26 | 14127 | 3 | 2 | 2 | 2 | 0.63 | Histone H2A type 1-B/E OS=Homo sapiens GN=HIST1H2AB PE=1 SV=2               |
| 63 | RS10_HUMAN  | 21 | 18886 | 2 | 1 | 1 | 1 | 0.2  | 40S ribosomal protein S10 OS=Homo sapiens GN=RPS10 PE=1 SV=1                |
| 64 | PUR6_HUMAN  | 19 | 47790 | 1 | 1 | 1 | 1 | 0.08 | Multifunctional protein ADE2 OS=Homo sapiens GN=PAICS PE=1 SV=3             |

**Table S2: Putative VgrG4-CTD ligands identified in lung epithelial cells (A549) membrane-enriched fraction**

|    | Accession   | Score | Mass   | N° of matches | N° of significant matches | N° of sequences | N° of significant sequences | emPAI | Description                                                                           |
|----|-------------|-------|--------|---------------|---------------------------|-----------------|-----------------------------|-------|---------------------------------------------------------------------------------------|
| 1  | VIME_HUMAN  | 1095  | 53676  | 35            | 34                        | 22              | 22                          | 4.35  | Vimentin OS=Homo sapiens GN=VIM PE=1 SV=4                                             |
| 2  | KPYM_HUMAN  | 947   | 58470  | 23            | 23                        | 18              | 18                          | 2.23  | Pyruvate kinase PKM OS=Homo sapiens GN=PKM PE=1 SV=4                                  |
| 3  | K1C18_HUMAN | 939   | 48029  | 33            | 29                        | 19              | 16                          | 2.85  | Keratin, type I cytoskeletal 18 OS=Homo sapiens GN=KRT18 PE=1 SV=2                    |
| 4  | K2C8_HUMAN  | 800   | 53671  | 28            | 26                        | 18              | 17                          | 2.13  | Keratin, type II cytoskeletal 8 OS=Homo sapiens GN=KRT8 PE=1 SV=7                     |
| 5  | FLNA_HUMAN  | 786   | 283301 | 29            | 24                        | 19              | 15                          | 0.23  | Filamin-A OS=Homo sapiens GN=FLNA PE=1 SV=4                                           |
| 6  | ACTB_HUMAN  | 714   | 42052  | 17            | 13                        | 11              | 9                           | 1.35  | Actin, cytoplasmic 1 OS=Homo sapiens GN=ACTB PE=1 SV=1                                |
| 7  | ANXA2_HUMAN | 623   | 38808  | 17            | 16                        | 9               | 8                           | 1.29  | Annexin A2 OS=Homo sapiens GN=ANXA2 PE=1 SV=2                                         |
| 8  | ACTN4_HUMAN | 590   | 105245 | 15            | 15                        | 10              | 10                          | 0.41  | Alpha-actinin-4 OS=Homo sapiens GN=ACTN4 PE=1 SV=2                                    |
| 9  | ATPB_HUMAN  | 482   | 56525  | 12            | 10                        | 8               | 8                           | 0.67  | ATP synthase subunit beta, mitochondrial OS=Homo sapiens GN=ATP5B PE=1 SV=3           |
| 10 | HSP7C_HUMAN | 460   | 71082  | 13            | 12                        | 9               | 8                           | 0.5   | Heat shock cognate 71 kDa protein OS=Homo sapiens GN=HSPA8 PE=1 SV=1                  |
| 11 | CH60_HUMAN  | 385   | 61187  | 13            | 11                        | 9               | 9                           | 0.7   | 60 kDa heat shock protein, mitochondrial OS=Homo sapiens GN=HSPD1 PE=1 SV=2           |
| 12 | HNRPK_HUMAN | 344   | 51230  | 10            | 9                         | 4               | 4                           | 0.42  | Heterogeneous nuclear ribonucleoprotein K OS=Homo sapiens GN=HNRNPK PE=1 SV=1         |
| 13 | AL1A1_HUMAN | 342   | 55454  | 9             | 8                         | 9               | 8                           | 0.68  | Retinal dehydrogenase 1 OS=Homo sapiens GN=ALDH1A1 PE=1 SV=2                          |
| 14 | TBB5_HUMAN  | 319   | 50095  | 9             | 9                         | 7               | 7                           | 0.65  | Tubulin beta chain OS=Homo sapiens GN=TUBB PE=1 SV=2                                  |
| 15 | ANXA1_HUMAN | 308   | 38918  | 13            | 11                        | 7               | 5                           | 0.74  | Annexin A1 OS=Homo sapiens GN=ANXA1 PE=1 SV=2                                         |
| 16 | GRP75_HUMAN | 255   | 73920  | 9             | 9                         | 7               | 7                           | 0.41  | Stress-70 protein, mitochondrial OS=Homo sapiens GN=HSPA9 PE=1 SV=2                   |
| 17 | H33_HUMAN   | 217   | 15376  | 4             | 4                         | 3               | 3                           | 0.97  | Histone H3.3 OS=Homo sapiens GN=H3F3A PE=1 SV=2                                       |
| 18 | PDIA6_HUMAN | 205   | 48490  | 6             | 6                         | 3               | 3                           | 0.25  | Protein disulfide-isomerase A6 OS=Homo sapiens GN=PDIA6 PE=1 SV=1                     |
| 19 | H2B1C_HUMAN | 204   | 13898  | 7             | 6                         | 3               | 3                           | 1.71  | Histone H2B type 1-C/E/F/G/I OS=Homo sapiens GN=HIST1H2BC PE=1 SV=4                   |
| 20 | ENOA_HUMAN  | 198   | 47481  | 8             | 7                         | 8               | 7                           | 0.7   | Alpha-enolase OS=Homo sapiens GN=ENO1 PE=1 SV=2                                       |
| 21 | EF1A1_HUMAN | 194   | 50451  | 11            | 8                         | 7               | 5                           | 0.43  | Elongation factor 1-alpha 1 OS=Homo sapiens GN=EEF1A1 PE=1 SV=1                       |
| 22 | EF2_HUMAN   | 181   | 96246  | 11            | 8                         | 9               | 6                           | 0.25  | Elongation factor 2 OS=Homo sapiens GN=EEF2 PE=1 SV=4                                 |
| 23 | ROA2_HUMAN  | 179   | 37464  | 4             | 3                         | 4               | 3                           | 0.33  | Heterogeneous nuclear ribonucleoproteins A2/B1 OS=Homo sapiens GN=HNRNPA2B1 PE=1 SV=2 |
| 24 | AK1C2_HUMAN | 170   | 37111  | 5             | 5                         | 5               | 5                           | 0.62  | Aldo-keto reductase family 1 member C2 OS=Homo sapiens GN=AKR1C2 PE=1 SV=3            |
| 25 | TBA1B_HUMAN | 162   | 50804  | 4             | 4                         | 3               | 3                           | 0.24  | Tubulin alpha-1B chain OS=Homo sapiens GN=TUBA1B PE=1 SV=1                            |
| 26 | HSPB1_HUMAN | 162   | 22826  | 5             | 5                         | 3               | 3                           | 0.59  | Heat shock protein beta-1 OS=Homo sapiens GN=HSPB1 PE=1 SV=2                          |

|    |             |     |        |    |   |   |   |      |                                                                                                            |
|----|-------------|-----|--------|----|---|---|---|------|------------------------------------------------------------------------------------------------------------|
| 27 | LMNA_HUMAN  | 159 | 74380  | 5  | 5 | 4 | 4 | 0.28 | Prelamin-A/C OS=Homo sapiens GN=LMNA PE=1 SV=1                                                             |
| 28 | IF5A1_HUMAN | 155 | 17049  | 5  | 4 | 4 | 3 | 0.85 | Eukaryotic translation initiation factor 5A-1 OS=Homo sapiens GN=EIF5A PE=1 SV=2                           |
| 29 | 4F2_HUMAN   | 150 | 68180  | 4  | 4 | 2 | 2 | 0.11 | 4F2 cell-surface antigen heavy chain OS=Homo sapiens GN=SLC3A2 PE=1 SV=3                                   |
| 31 | PRDX1_HUMAN | 139 | 22324  | 3  | 2 | 3 | 2 | 0.37 | Peroxiredoxin-1 OS=Homo sapiens GN=PRDX1 PE=1 SV=1                                                         |
| 30 | PRDX6_HUMAN | 139 | 25133  | 4  | 4 | 4 | 4 | 0.76 | Peroxiredoxin-6 OS=Homo sapiens GN=PRDX6 PE=1 SV=3                                                         |
| 32 | ANXA4_HUMAN | 136 | 36088  | 2  | 2 | 2 | 2 | 0.22 | Annexin A4 OS=Homo sapiens GN=ANXA4 PE=1 SV=4                                                              |
| 34 | RAB10_HUMAN | 124 | 22755  | 3  | 3 | 1 | 1 | 0.17 | Ras-related protein Rab-10 OS=Homo sapiens GN=RAB10 PE=1 SV=1                                              |
| 33 | PDIA1_HUMAN | 124 | 57480  | 10 | 8 | 6 | 5 | 0.46 | Protein disulfide-isomerase OS=Homo sapiens GN=P4HB PE=1 SV=3                                              |
| 35 | SDHA_HUMAN  | 120 | 73672  | 1  | 1 | 1 | 1 | 0.05 | Succinate dehydrogenase [ubiquinone] flavoprotein subunit, mitochondrial OS=Homo sapiens GN=SDHA PE=1 SV=2 |
| 36 | UGDH_HUMAN  | 116 | 55674  | 3  | 3 | 3 | 3 | 0.21 | UDP-glucose 6-dehydrogenase OS=Homo sapiens GN=UGDH PE=1 SV=1                                              |
| 37 | RA1L2_HUMAN | 113 | 34375  | 2  | 2 | 2 | 2 | 0.23 | Heterogeneous nuclear ribonucleoprotein A1-like 2 OS=Homo sapiens GN=HNRNPA1L2 PE=2 SV=2                   |
| 38 | K2C1_HUMAN  | 109 | 66170  | 3  | 3 | 2 | 2 | 0.12 | Keratin, type II cytoskeletal 1 OS=Homo sapiens GN=KRT1 PE=1 SV=6                                          |
| 39 | TCPB_HUMAN  | 108 | 57794  | 2  | 1 | 2 | 1 | 0.06 | T-complex protein 1 subunit beta OS=Homo sapiens GN=CCT2 PE=1 SV=4                                         |
| 40 | ACOC_HUMAN  | 103 | 98850  | 2  | 2 | 1 | 1 | 0.08 | Cytoplasmic aconitate hydratase OS=Homo sapiens GN=ACO1 PE=1 SV=3                                          |
| 41 | RAP1A_HUMAN | 95  | 21316  | 2  | 2 | 1 | 1 | 0.18 | Ras-related protein Rap-1A OS=Homo sapiens GN=RAP1A PE=1 SV=1                                              |
| 42 | TLN1_HUMAN  | 92  | 271766 | 2  | 2 | 2 | 2 | 0.03 | Talin-1 OS=Homo sapiens GN=TLN1 PE=1 SV=3                                                                  |
| 43 | TERA_HUMAN  | 91  | 89950  | 6  | 4 | 5 | 4 | 0.18 | Transitional endoplasmic reticulum ATPase OS=Homo sapiens GN=VCP PE=1 SV=4                                 |
| 44 | DDX5_HUMAN  | 90  | 69618  | 2  | 2 | 1 | 1 | 0.05 | Probable ATP-dependent RNA helicase DDX5 OS=Homo sapiens GN=DDX5 PE=1 SV=1                                 |
| 45 | H2A1D_HUMAN | 90  | 14099  | 5  | 5 | 3 | 3 | 1.09 | Histone H2A type 1-D OS=Homo sapiens GN=HIST1H2AD PE=1 SV=2                                                |
| 47 | LPPRC_HUMAN | 81  | 159003 | 1  | 1 | 1 | 1 | 0.02 | Leucine-rich PPR motif-containing protein, mitochondrial OS=Homo sapiens GN=LRPPRC PE=1 SV=3               |
| 46 | STML2_HUMAN | 81  | 38624  | 2  | 2 | 1 | 1 | 0.1  | Stomatin-like protein 2, mitochondrial OS=Homo sapiens GN=STOML2 PE=1 SV=1                                 |
| 48 | EEF1G_HUMAN | 81  | 50429  | 2  | 2 | 2 | 2 | 0.15 | Elongation factor 1-gamma OS=Homo sapiens GN=EEF1G PE=1 SV=3                                               |
| 49 | CKAP4_HUMAN | 80  | 66097  | 2  | 1 | 2 | 1 | 0.06 | Cytoskeleton-associated protein 4 OS=Homo sapiens GN=CKAP4 PE=1 SV=2                                       |
| 50 | RSSA_HUMAN  | 78  | 32947  | 1  | 1 | 1 | 1 | 0.11 | 40S ribosomal protein SA OS=Homo sapiens GN=RPSA PE=1 SV=4                                                 |
| 51 | 1433E_HUMAN | 78  | 29326  | 3  | 3 | 3 | 3 | 0.44 | 14-3-3 protein epsilon OS=Homo sapiens GN=YWHAE PE=1 SV=1                                                  |
| 52 | SPTN1_HUMAN | 75  | 285163 | 2  | 2 | 2 | 2 | 0.03 | Spectrin alpha chain, non-erythrocytic 1 OS=Homo sapiens GN=SPTAN1 PE=1 SV=3                               |
| 54 | LDHA_HUMAN  | 73  | 36950  | 2  | 1 | 2 | 1 | 0.1  | L-lactate dehydrogenase A chain OS=Homo sapiens GN=LDHA PE=1 SV=2                                          |
| 53 | EEF1D_HUMAN | 73  | 31217  | 4  | 3 | 3 | 3 | 0.41 | Elongation factor 1-delta OS=Homo sapiens GN=EEF1D PE=1 SV=5                                               |
| 55 | SFPQ_HUMAN  | 71  | 76216  | 2  | 2 | 2 | 2 | 0.1  | Splicing factor, proline- and glutamine-rich OS=Homo sapiens GN=SFPQ PE=1 SV=2                             |
| 56 | TAGL2_HUMAN | 71  | 22548  | 2  | 1 | 2 | 1 | 0.17 | Transgelin-2 OS=Homo sapiens GN=TAGLN2 PE=1 SV=3                                                           |



|    |             |    |        |   |   |   |   |      |                                                                                                            |
|----|-------------|----|--------|---|---|---|---|------|------------------------------------------------------------------------------------------------------------|
| 57 | NUCL_HUMAN  | 71 | 76625  | 3 | 3 | 3 | 3 | 0.15 | Nucleolin OS=Homo sapiens GN=NCL PE=1 SV=3                                                                 |
| 58 | HOOK3_HUMAN | 68 | 83474  | 1 | 1 | 1 | 1 | 0.04 | Protein Hook homolog 3 OS=Homo sapiens GN=HOOK3 PE=1 SV=2                                                  |
| 59 | ADT2_HUMAN  | 67 | 33059  | 3 | 3 | 3 | 3 | 0.38 | ADP/ATP translocase 2 OS=Homo sapiens GN=SLC25A5 PE=1 SV=7                                                 |
| 60 | RLA1_HUMAN  | 67 | 11621  | 5 | 3 | 3 | 2 | 0.8  | 60S acidic ribosomal protein P1 OS=Homo sapiens GN=RPLP1 PE=1 SV=1                                         |
| 61 | AL3A1_HUMAN | 66 | 50762  | 1 | 1 | 1 | 1 | 0.07 | Aldehyde dehydrogenase, dimeric NADP-preferring OS=Homo sapiens GN=ALDH3A1 PE=1 SV=3                       |
| 62 | PDIA3_HUMAN | 66 | 57146  | 2 | 2 | 2 | 2 | 0.13 | Protein disulfide-isomerase A3 OS=Homo sapiens GN=PDIA3 PE=1 SV=4                                          |
| 63 | TPM1_HUMAN  | 64 | 32746  | 1 | 1 | 1 | 1 | 0.12 | Tropomyosin alpha-1 chain OS=Homo sapiens GN=TPM1 PE=1 SV=2                                                |
| 65 | ARP3B_HUMAN | 63 | 48090  | 2 | 2 | 1 | 1 | 0.08 | Actin-related protein 3B OS=Homo sapiens GN=ACTR3B PE=2 SV=1                                               |
| 66 | PRDX3_HUMAN | 63 | 28017  | 2 | 2 | 1 | 1 | 0.14 | Thioredoxin-dependent peroxide reductase, mitochondrial OS=Homo sapiens GN=PRDX3 PE=1 SV=3                 |
| 64 | SAP_HUMAN   | 63 | 59899  | 5 | 3 | 3 | 2 | 0.13 | Prosaposin OS=Homo sapiens GN=PSAP PE=1 SV=2                                                               |
| 67 | C1QBP_HUMAN | 60 | 31742  | 2 | 2 | 1 | 1 | 0.12 | Complement component 1 Q subcomponent-binding protein, mitochondrial OS=Homo sapiens GN=C1QBP PE=1 SV=1    |
| 68 | ATP5H_HUMAN | 59 | 18537  | 2 | 2 | 2 | 2 | 0.46 | ATP synthase subunit d, mitochondrial OS=Homo sapiens GN=ATP5H PE=1 SV=3                                   |
| 69 | RPN2_HUMAN  | 56 | 69355  | 1 | 1 | 1 | 1 | 0.05 | Dolichyl-diphosphooligosaccharide--protein glycosyltransferase subunit 2 OS=Homo sapiens GN=RPN2 PE=1 SV=3 |
| 70 | HNRPL_HUMAN | 55 | 64720  | 1 | 1 | 1 | 1 | 0.06 | Heterogeneous nuclear ribonucleoprotein L OS=Homo sapiens GN=HNRNPL PE=1 SV=2                              |
| 71 | RLA2_HUMAN  | 53 | 11658  | 3 | 3 | 2 | 2 | 0.8  | 60S acidic ribosomal protein P2 OS=Homo sapiens GN=RPLP2 PE=1 SV=1                                         |
| 72 | RS12_HUMAN  | 52 | 14905  | 1 | 1 | 1 | 1 | 0.26 | 40S ribosomal protein S12 OS=Homo sapiens GN=RPS12 PE=1 SV=3                                               |
| 73 | RAB1A_HUMAN | 52 | 22891  | 2 | 2 | 1 | 1 | 0.17 | Ras-related protein Rab-1A OS=Homo sapiens GN=RAB1A PE=1 SV=3                                              |
| 75 | NPM_HUMAN   | 51 | 32726  | 1 | 1 | 1 | 1 | 0.12 | Nucleophosmin OS=Homo sapiens GN=NPM1 PE=1 SV=2                                                            |
| 74 | ETFA_HUMAN  | 51 | 35400  | 2 | 2 | 2 | 2 | 0.22 | Electron transfer flavoprotein subunit alpha, mitochondrial OS=Homo sapiens GN=ETFA PE=1 SV=1              |
| 76 | KTN1_HUMAN  | 51 | 156464 | 2 | 1 | 2 | 1 | 0.02 | Kinectin OS=Homo sapiens GN=KTN1 PE=1 SV=1                                                                 |
| 77 | PLEC_HUMAN  | 50 | 533462 | 7 | 2 | 6 | 2 | 0.01 | Plectin OS=Homo sapiens GN=PLEC PE=1 SV=3                                                                  |
| 78 | PP1A_HUMAN  | 48 | 38229  | 1 | 1 | 1 | 1 | 0.1  | Serine/threonine-protein phosphatase PP1-alpha catalytic subunit OS=Homo sapiens GN=PPP1CA PE=1 SV=1       |
| 80 | KYNU_HUMAN  | 43 | 52831  | 1 | 1 | 1 | 1 | 0.07 | Kynureninase OS=Homo sapiens GN=KYNU PE=1 SV=1                                                             |
| 79 | HCD2_HUMAN  | 43 | 27134  | 2 | 1 | 2 | 1 | 0.14 | 3-hydroxyacyl-CoA dehydrogenase type-2 OS=Homo sapiens GN=HSD17B10 PE=1 SV=3                               |
| 81 | PTBP1_HUMAN | 42 | 57357  | 2 | 1 | 2 | 1 | 0.06 | Polypyrimidine tract-binding protein 1 OS=Homo sapiens GN=PTBP1 PE=1 SV=1                                  |
| 82 | PDXK_HUMAN  | 41 | 35308  | 2 | 2 | 1 | 1 | 0.22 | Pyridoxal kinase OS=Homo sapiens GN=PDXK PE=1 SV=1                                                         |
| 83 | PPIA_HUMAN  | 40 | 18229  | 1 | 1 | 1 | 1 | 0.21 | Peptidyl-prolyl cis-trans isomerase A OS=Homo sapiens GN=PPIA PE=1 SV=2                                    |
| 85 | ML12A_HUMAN | 40 | 19839  | 1 | 1 | 1 | 1 | 0.19 | Myosin regulatory light chain 12A OS=Homo sapiens GN=MYL12A PE=1 SV=2                                      |
| 84 | HNRH1_HUMAN | 40 | 49484  | 3 | 2 | 2 | 2 | 0.16 | Heterogeneous nuclear ribonucleoprotein H OS=Homo sapiens GN=HNRNPH1 PE=1 SV=4                             |
| 86 | CAPR1_HUMAN | 39 | 78489  | 1 | 1 | 1 | 1 | 0.05 | Caprin-1 OS=Homo sapiens GN=CAPRIN1 PE=1 SV=2                                                              |

|     |             |    |        |   |   |   |   |      |                                                                                                   |
|-----|-------------|----|--------|---|---|---|---|------|---------------------------------------------------------------------------------------------------|
| 87  | EF1B_HUMAN  | 39 | 24919  | 1 | 1 | 1 | 1 | 0.15 | Elongation factor 1-beta OS=Homo sapiens GN=EEF1B2 PE=1 SV=3                                      |
| 88  | GSTO1_HUMAN | 38 | 27833  | 1 | 1 | 1 | 1 | 0.14 | Glutathione S-transferase omega-1 OS=Homo sapiens GN=GSTO1 PE=1 SV=2                              |
| 89  | RS4X_HUMAN  | 37 | 29807  | 1 | 1 | 1 | 1 | 0.13 | 40S ribosomal protein S4, X isoform OS=Homo sapiens GN=RPS4X PE=1 SV=2                            |
| 90  | HSP74_HUMAN | 36 | 95127  | 1 | 1 | 1 | 1 | 0.04 | Heat shock 70 kDa protein 4 OS=Homo sapiens GN=HSPA4 PE=1 SV=4                                    |
| 91  | CLH1_HUMAN  | 35 | 193260 | 1 | 1 | 1 | 1 | 0.02 | Clathrin heavy chain 1 OS=Homo sapiens GN=CLTC PE=1 SV=5                                          |
| 92  | PHB_HUMAN   | 35 | 29843  | 1 | 1 | 1 | 1 | 0.13 | Prohibitin OS=Homo sapiens GN=PHB PE=1 SV=1                                                       |
| 93  | MIC60_HUMAN | 35 | 84026  | 1 | 1 | 1 | 1 | 0.04 | MICOS complex subunit MIC60 OS=Homo sapiens GN=IMMT PE=1 SV=1                                     |
| 94  | EFTU_HUMAN  | 34 | 49852  | 1 | 1 | 1 | 1 | 0.07 | Elongation factor Tu, mitochondrial OS=Homo sapiens GN=TUFM PE=1 SV=2                             |
| 95  | ATPA_HUMAN  | 33 | 59828  | 1 | 1 | 1 | 1 | 0.06 | ATP synthase subunit alpha, mitochondrial OS=Homo sapiens GN=ATP5A1 PE=1 SV=1                     |
| 97  | MATR3_HUMAN | 32 | 95078  | 1 | 1 | 1 | 1 | 0.04 | Matrin-3 OS=Homo sapiens GN=MATR3 PE=1 SV=2                                                       |
| 98  | RS27A_HUMAN | 32 | 18296  | 1 | 1 | 1 | 1 | 0.21 | Ubiquitin-40S ribosomal protein S27a OS=Homo sapiens GN=RPS27A PE=1 SV=2                          |
| 99  | LDHB_HUMAN  | 32 | 36900  | 1 | 1 | 1 | 1 | 0.1  | L-lactate dehydrogenase B chain OS=Homo sapiens GN=LDHB PE=1 SV=2                                 |
| 96  | MYL6_HUMAN  | 32 | 17090  | 2 | 1 | 2 | 1 | 0.23 | Myosin light polypeptide 6 OS=Homo sapiens GN=MYL6 PE=1 SV=2                                      |
| 101 | NP1L1_HUMAN | 31 | 45631  | 1 | 1 | 1 | 1 | 0.08 | Nucleosome assembly protein 1-like 1 OS=Homo sapiens GN=NAP1L1 PE=1 SV=1                          |
| 100 | LRC59_HUMAN | 31 | 35308  | 2 | 1 | 2 | 1 | 0.11 | Leucine-rich repeat-containing protein 59 OS=Homo sapiens GN=LRR59 PE=1 SV=1                      |
| 102 | H4_HUMAN    | 30 | 11360  | 1 | 1 | 1 | 1 | 0.35 | Histone H4 OS=Homo sapiens GN=HIST1H4A PE=1 SV=2                                                  |
| 103 | RS16_HUMAN  | 30 | 16549  | 1 | 1 | 1 | 1 | 0.23 | 40S ribosomal protein S16 OS=Homo sapiens GN=RPS16 PE=1 SV=2                                      |
| 104 | RRBP1_HUMAN | 30 | 152780 | 1 | 1 | 1 | 1 | 0.02 | Ribosome-binding protein 1 OS=Homo sapiens GN=RRBP1 PE=1 SV=4                                     |
| 105 | ENPL_HUMAN  | 29 | 92696  | 1 | 1 | 1 | 1 | 0.04 | Endoplasmic reticulum protein OS=Homo sapiens GN=HSP90B1 PE=1 SV=1                                |
| 106 | TCPG_HUMAN  | 29 | 61066  | 1 | 1 | 1 | 1 | 0.06 | T-complex protein 1 subunit gamma OS=Homo sapiens GN=CCT3 PE=1 SV=4                               |
| 107 | ANXA5_HUMAN | 26 | 35971  | 1 | 1 | 1 | 1 | 0.1  | Annexin A5 OS=Homo sapiens GN=ANXA5 PE=1 SV=2                                                     |
| 108 | 2B1D_HUMAN  | 26 | 30331  | 1 | 1 | 1 | 1 | 0.13 | HLA class II histocompatibility antigen, DRB1-13 beta chain OS=Homo sapiens GN=HLA-DRB1 PE=1 SV=1 |
| 109 | HNRDL_HUMAN | 26 | 46580  | 1 | 1 | 1 | 1 | 0.08 | Heterogeneous nuclear ribonucleoprotein D-like OS=Homo sapiens GN=HNRNPDL PE=1 SV=3               |
| 110 | IF4A1_HUMAN | 24 | 46353  | 1 | 1 | 1 | 1 | 0.08 | Eukaryotic initiation factor 4A-I OS=Homo sapiens GN=EIF4A1 PE=1 SV=1                             |
| 111 | TALDO_HUMAN | 24 | 37688  | 1 | 1 | 1 | 1 | 0.1  | Transaldolase OS=Homo sapiens GN=TALDO1 PE=1 SV=2                                                 |
| 112 | 6PGD_HUMAN  | 24 | 53619  | 2 | 1 | 2 | 1 | 0.07 | 6-phosphogluconate dehydrogenase, decarboxylating OS=Homo sapiens GN=PGD PE=1 SV=3                |
| 113 | UBA1_HUMAN  | 22 | 118858 | 2 | 1 | 2 | 1 | 0.03 | Ubiquitin-like modifier-activating enzyme 1 OS=Homo sapiens GN=UBA1 PE=1 SV=3                     |
| 114 | LEG1_HUMAN  | 21 | 15048  | 2 | 1 | 2 | 1 | 0.26 | Galectin-1 OS=Homo sapiens GN=LGALS1 PE=1 SV=2                                                    |
| 115 | CNPY2_HUMAN | 20 | 20981  | 1 | 1 | 1 | 1 | 0.18 | Protein canopy homolog 2 OS=Homo sapiens GN=CNPY2 PE=1 SV=1                                       |
| 116 | HNRPQ_HUMAN | 20 | 69788  | 1 | 1 | 1 | 1 | 0.05 | Heterogeneous nuclear ribonucleoprotein Q OS=Homo sapiens GN=SYNCRIP PE=1 SV=2                    |

|     |             |    |       |   |   |   |   |      |                                                                               |
|-----|-------------|----|-------|---|---|---|---|------|-------------------------------------------------------------------------------|
| 117 | LBX1_HUMAN  | 19 | 30430 | 1 | 1 | 1 | 1 | 0.12 | Transcription factor LBX1 OS=Homo sapiens GN=LBX1 PE=2 SV=2                   |
| 118 | HNRPU_HUMAN | 16 | 91269 | 1 | 1 | 1 | 1 | 0.04 | Heterogeneous nuclear ribonucleoprotein U OS=Homo sapiens GN=HNRNPU PE=1 SV=6 |
| 119 | SRSF3_HUMAN | 15 | 19546 | 2 | 1 | 1 | 1 | 0.2  | Serine/arginine-rich splicing factor 3 OS=Homo sapiens GN=SRSF3 PE=1 SV=1     |

**Table S3: Putative VgrG4-CTD ligands identified in THP1 macrophages soluble fraction**

|    | Accession   | Score | Mass   | N° of matches | N° of significant matches | N° of sequences | N° of significant sequences | emPAI | Description                                                                            |
|----|-------------|-------|--------|---------------|---------------------------|-----------------|-----------------------------|-------|----------------------------------------------------------------------------------------|
| 1  | ENOA_HUMAN  | 2362  | 47481  | 66            | 64                        | 14              | 14                          | 2.91  | Alpha-enolase OS=Homo sapiens GN=ENO1 PE=1 SV=2                                        |
| 2  | G3P_HUMAN   | 986   | 36201  | 31            | 29                        | 8               | 7                           | 1.21  | Glyceraldehyde-3-phosphate dehydrogenase OS=Homo sapiens GN=GAPDH PE=1 SV=3            |
| 3  | EF1A1_HUMAN | 923   | 50451  | 32            | 25                        | 9               | 5                           | 0.9   | Elongation factor 1-alpha 1 OS=Homo sapiens GN=EEF1A1 PE=1 SV=1                        |
| 4  | ACTB_HUMAN  | 807   | 42052  | 23            | 20                        | 6               | 6                           | 0.98  | Actin, cytoplasmic 1 OS=Homo sapiens GN=ACTB PE=1 SV=1                                 |
| 5  | KPYM_HUMAN  | 621   | 58470  | 26            | 23                        | 12              | 10                          | 0.85  | Pyruvate kinase PKM OS=Homo sapiens GN=PKM PE=1 SV=4                                   |
| 6  | TCPB_HUMAN  | 486   | 57794  | 21            | 15                        | 8               | 6                           | 0.55  | T-complex protein 1 subunit beta OS=Homo sapiens GN=CCT2 PE=1 SV=4                     |
| 7  | K2C1_HUMAN  | 435   | 66170  | 28            | 25                        | 10              | 8                           | 0.64  | Keratin, type II cytoskeletal 1 OS=Homo sapiens GN=KRT1 PE=1 SV=6                      |
| 8  | RS13_HUMAN  | 315   | 17212  | 11            | 11                        | 3               | 3                           | 0.84  | 40S ribosomal protein S13 OS=Homo sapiens GN=RPS13 PE=1 SV=2                           |
| 9  | RS19_HUMAN  | 315   | 16051  | 16            | 14                        | 6               | 6                           | 2.66  | 40S ribosomal protein S13 OS=Homo sapiens GN=RPS13 PE=1 SV=2                           |
| 10 | PRDX6_HUMAN | 266   | 25133  | 14            | 11                        | 5               | 3                           | 0.53  | Peroxiredoxin-6 OS=Homo sapiens GN=PRDX6 PE=1 SV=3                                     |
| 11 | RS5_HUMAN   | 261   | 23033  | 9             | 9                         | 2               | 2                           | 0.36  | 40S ribosomal protein S5 OS=Homo sapiens GN=RPS5 PE=1 SV=4                             |
| 12 | K1C10_HUMAN | 231   | 59020  | 15            | 12                        | 7               | 6                           | 0.44  | Keratin, type I cytoskeletal 10 OS=Homo sapiens GN=KRT10 PE=1 SV=6                     |
| 13 | RS18_HUMAN  | 231   | 17708  | 18            | 13                        | 6               | 5                           | 1.68  | 40S ribosomal protein S18 OS=Homo sapiens GN=RPS18 PE=1 SV=3                           |
| 14 | TCPZ_HUMAN  | 222   | 58444  | 10            | 5                         | 6               | 2                           | 0.13  | T-complex protein 1 subunit zeta OS=Homo sapiens GN=CCT6A PE=1 SV=3                    |
| 15 | RAP1A_HUMAN | 187   | 21316  | 5             | 5                         | 1               | 1                           | 0.18  | Ras-related protein Rap-1A OS=Homo sapiens GN=RAP1A PE=1 SV=1                          |
| 16 | K1C9_HUMAN  | 183   | 62255  | 7             | 7                         | 5               | 5                           | 0.34  | Keratin, type I cytoskeletal 9 OS=Homo sapiens GN=KRT9 PE=1 SV=3                       |
| 17 | RS25_HUMAN  | 172   | 13791  | 9             | 7                         | 4               | 4                           | 1.73  | 40S ribosomal protein S25 OS=Homo sapiens GN=RPS25 PE=1 SV=1                           |
| 18 | RS10_HUMAN  | 167   | 18886  | 16            | 10                        | 4               | 3                           | 0.75  | 40S ribosomal protein S10 OS=Homo sapiens GN=RPS10 PE=1 SV=1                           |
| 19 | RS20_HUMAN  | 162   | 13478  | 8             | 6                         | 2               | 2                           | 0.67  | 40S ribosomal protein S20 OS=Homo sapiens GN=RPS20 PE=1 SV=1                           |
| 20 | HSPB1_HUMAN | 149   | 22826  | 9             | 6                         | 4               | 3                           | 0.59  | Heat shock protein beta-1 OS=Homo sapiens GN=HSPB1 PE=1 SV=2                           |
| 21 | IF4G1_HUMAN | 147   | 176124 | 5             | 4                         | 3               | 2                           | 0.04  | Eukaryotic translation initiation factor 4 gamma 1 OS=Homo sapiens GN=EIF4G1 PE=1 SV=4 |
| 22 | RL12_HUMAN  | 138   | 17979  | 4             | 2                         | 2               | 1                           | 0.21  | 60S ribosomal protein L12 OS=Homo sapiens GN=RPL12 PE=1 SV=1                           |

|    |             |     |        |    |   |   |   |      |                                                                                |
|----|-------------|-----|--------|----|---|---|---|------|--------------------------------------------------------------------------------|
| 23 | TBA1B_HUMAN | 133 | 50804  | 11 | 7 | 5 | 2 | 0.15 | Tubulin alpha-1B chain OS=Homo sapiens GN=TUBA1B PE=1 SV=1                     |
| 24 | LDHA_HUMAN  | 126 | 36950  | 8  | 5 | 3 | 2 | 0.21 | L-lactate dehydrogenase A chain OS=Homo sapiens GN=LDHA PE=1 SV=2              |
| 25 | RS3A_HUMAN  | 112 | 30154  | 5  | 3 | 3 | 2 | 0.27 | 40S ribosomal protein S3a OS=Homo sapiens GN=RPS3A PE=1 SV=2                   |
| 26 | RS7_HUMAN   | 107 | 22113  | 5  | 5 | 2 | 2 | 0.61 | 40S ribosomal protein S7 OS=Homo sapiens GN=RPS7 PE=1 SV=1                     |
| 27 | HS90B_HUMAN | 95  | 83554  | 8  | 2 | 5 | 2 | 0.09 | Heat shock protein HSP 90-beta OS=Homo sapiens GN=HSP90AB1 PE=1 SV=4           |
| 28 | RS14_HUMAN  | 89  | 16434  | 3  | 3 | 1 | 1 | 0.24 | 40S ribosomal protein S14 OS=Homo sapiens GN=RPS14 PE=1 SV=3                   |
| 29 | TCPD_HUMAN  | 89  | 58401  | 7  | 4 | 4 | 2 | 0.13 | T-complex protein 1 subunit delta OS=Homo sapiens GN=CCT4 PE=1 SV=4            |
| 30 | RS4X_HUMAN  | 79  | 29807  | 6  | 5 | 2 | 2 | 0.27 | 40S ribosomal protein S4, X isoform OS=Homo sapiens GN=RPS4X PE=1 SV=2         |
| 31 | RS16_HUMAN  | 78  | 16549  | 5  | 4 | 1 | 1 | 0.23 | 40S ribosomal protein S16 OS=Homo sapiens GN=RPS16 PE=1 SV=2                   |
| 32 | RAB1A_HUMAN | 69  | 22891  | 9  | 5 | 4 | 3 | 0.59 | Ras-related protein Rab-1A OS=Homo sapiens GN=RAB1A PE=1 SV=3                  |
| 33 | CALX_HUMAN  | 68  | 67982  | 2  | 1 | 1 | 1 | 0.05 | Calnexin OS=Homo sapiens GN=CANX PE=1 SV=2                                     |
| 34 | ARF1_HUMAN  | 67  | 20741  | 5  | 3 | 3 | 1 | 0.18 | ADP-ribosylation factor 1 OS=Homo sapiens GN=ARF1 PE=1 SV=2                    |
| 35 | TCPE_HUMAN  | 63  | 60089  | 2  | 2 | 2 | 2 | 0.13 | T-complex protein 1 subunit epsilon OS=Homo sapiens GN=CCT5 PE=1 SV=1          |
| 36 | ITB2_HUMAN  | 54  | 87976  | 7  | 3 | 4 | 2 | 0.09 | Integrin beta-2 OS=Homo sapiens GN=ITGB2 PE=1 SV=2                             |
| 37 | RS17_HUMAN  | 53  | 15597  | 4  | 3 | 2 | 2 | 0.56 | 40S ribosomal protein S17 OS=Homo sapiens GN=RPS17 PE=1 SV=2                   |
| 38 | TCPG_HUMAN  | 47  | 61066  | 2  | 2 | 1 | 1 | 0.06 | T-complex protein 1 subunit gamma OS=Homo sapiens GN=CCT3 PE=1 SV=4            |
| 39 | RL11_HUMAN  | 47  | 20468  | 2  | 2 | 1 | 1 | 0.19 | 60S ribosomal protein L11 OS=Homo sapiens GN=RPL11 PE=1 SV=2                   |
| 40 | ARPC4_HUMAN | 47  | 19768  | 5  | 4 | 3 | 3 | 0.71 | Actin-related protein 2/3 complex subunit 4 OS=Homo sapiens GN=ARPC4 PE=1 SV=3 |
| 41 | SERA_HUMAN  | 46  | 57356  | 10 | 5 | 2 | 2 | 0.13 | D-3-phosphoglycerate dehydrogenase OS=Homo sapiens GN=PHGDH PE=1 SV=4          |
| 42 | AMPN_HUMAN  | 45  | 109870 | 3  | 2 | 3 | 2 | 0.07 | Aminopeptidase N OS=Homo sapiens GN=ANPEP PE=1 SV=4                            |
| 43 | FACE1_HUMAN | 44  | 55063  | 1  | 1 | 1 | 1 | 0.07 | CAAX prenyl protease 1 homolog OS=Homo sapiens GN=ZMPSTE24 PE=1 SV=2           |
| 44 | H4_HUMAN    | 43  | 11360  | 8  | 6 | 3 | 2 | 0.83 | Histone H4 OS=Homo sapiens GN=HIST1H4A PE=1 SV=2                               |
| 45 | RAC2_HUMAN  | 42  | 21814  | 10 | 6 | 4 | 4 | 0.91 | Ras-related C3 botulinum toxin substrate 2 OS=Homo sapiens GN=RAC2 PE=1 SV=1   |
| 46 | RS3_HUMAN   | 40  | 26842  | 5  | 3 | 4 | 3 | 0.49 | 40S ribosomal protein S3 OS=Homo sapiens GN=RPS3 PE=1 SV=2                     |
| 47 | USO1_HUMAN  | 39  | 108740 | 3  | 2 | 1 | 1 | 0.03 | General vesicular transport factor p115 OS=Homo sapiens GN=USO1 PE=1 SV=2      |
| 48 | CDC42_HUMAN | 39  | 21587  | 3  | 2 | 1 | 1 | 0.39 | Cell division control protein 42 homolog OS=Homo sapiens GN=CDC42 PE=1 SV=2    |

|    |             |    |        |   |   |   |   |      |                                                                          |
|----|-------------|----|--------|---|---|---|---|------|--------------------------------------------------------------------------|
| 49 | LEG1_HUMAN  | 39 | 15048  | 4 | 3 | 2 | 2 | 0.58 | Galectin-1 OS=Homo sapiens GN=LGALS1 PE=1 SV=2                           |
| 50 | COF1_HUMAN  | 35 | 18719  | 2 | 1 | 2 | 1 | 0.21 | Cofilin-1 OS=Homo sapiens GN=CFL1 PE=1 SV=3                              |
| 51 | RL31_HUMAN  | 33 | 14454  | 1 | 1 | 1 | 1 | 0.27 | 60S ribosomal protein L31 OS=Homo sapiens GN=RPL31 PE=1 SV=1             |
| 52 | RL30_HUMAN  | 32 | 12947  | 1 | 1 | 1 | 1 | 0.3  | 60S ribosomal protein L30 OS=Homo sapiens GN=RPL30 PE=1 SV=2             |
| 53 | PUR6_HUMAN  | 31 | 47790  | 1 | 1 | 1 | 1 | 0.08 | Multifunctional protein ADE2 OS=Homo sapiens GN=PAICS PE=1 SV=3          |
| 54 | RL27A_HUMAN | 31 | 16665  | 4 | 2 | 1 | 1 | 0.23 | 60S ribosomal protein L27a OS=Homo sapiens GN=RPL27A PE=1 SV=2           |
| 55 | TCPA_HUMAN  | 31 | 60819  | 4 | 3 | 2 | 2 | 0.13 | T-complex protein 1 subunit alpha OS=Homo sapiens GN=TCP1 PE=1 SV=1      |
| 56 | RL23A_HUMAN | 29 | 17684  | 1 | 1 | 1 | 1 | 0.22 | 60S ribosomal protein L23a OS=Homo sapiens GN=RPL23A PE=1 SV=1           |
| 57 | ADT1_HUMAN  | 27 | 33271  | 3 | 3 | 1 | 1 | 0.11 | ADP/ATP translocase 1 OS=Homo sapiens GN=SLC25A4 PE=1 SV=4               |
| 58 | RL36_HUMAN  | 27 | 12303  | 3 | 1 | 3 | 1 | 0.32 | 60S ribosomal protein L36 OS=Homo sapiens GN=RPL36 PE=1 SV=3             |
| 59 | TBB2A_HUMAN | 26 | 50274  | 1 | 1 | 1 | 1 | 0.07 | Tubulin beta-2A chain OS=Homo sapiens GN=TUBB2A PE=1 SV=1                |
| 60 | SMAP2_HUMAN | 21 | 47097  | 4 | 2 | 4 | 2 | 0.17 | Stromal membrane-associated protein 2 OS=Homo sapiens GN=SMAP2 PE=1 SV=1 |
| 61 | DYHC2_HUMAN | 21 | 495790 | 7 | 2 | 2 | 1 | 0.01 | Cytoplasmic dynein 2 heavy chain 1 OS=Homo sapiens GN=DYNC2H1 PE=1 SV=4  |
| 62 | PDIA6_HUMAN | 18 | 48490  | 1 | 1 | 1 | 1 | 0.08 | Protein disulfide-isomerase A6 OS=Homo sapiens GN=PDIA6 PE=1 SV=1        |
| 63 | 4F2_HUMAN   | 18 | 68180  | 1 | 1 | 1 | 1 | 0.05 | 4F2 cell-surface antigen heavy chain OS=Homo sapiens GN=SLC3A2 PE=1 SV=3 |
| 64 | LDHB_HUMAN  | 17 | 36900  | 1 | 1 | 1 | 1 | 0.1  | L-lactate dehydrogenase B chain OS=Homo sapiens GN=LDHB PE=1 SV=2        |
| 65 | ANX11_HUMAN | 15 | 54697  | 1 | 1 | 1 | 1 | 0.07 | Annexin A11 OS=Homo sapiens GN=ANXA11 PE=1 SV=1                          |
| 66 | EHD4_HUMAN  | 14 | 61365  | 1 | 1 | 1 | 1 | 0.06 | EH domain-containing protein 4 OS=Homo sapiens GN=EHD4 PE=1 SV=1         |
| 67 | RS11_HUMAN  | 14 | 18590  | 3 | 1 | 1 | 1 | 0.22 | 40S ribosomal protein S11 OS=Homo sapiens GN=RPS11 PE=1 SV=3             |
| 68 | MOT4_HUMAN  | 13 | 50064  | 2 | 1 | 1 | 1 | 0.07 | Monocarboxylate transporter 4 OS=Homo sapiens GN=SLC16A3 PE=1 SV=1       |

**Table S4: Putative VgrG4-CTD ligands identified in THP1 macrophages membrane-enriched fraction**

|    | Accession   | Score | Mass  | N° of matches | N° of significant matches | N° of sequences | N° of significant sequences | empAI | Description                                                                                                |
|----|-------------|-------|-------|---------------|---------------------------|-----------------|-----------------------------|-------|------------------------------------------------------------------------------------------------------------|
| 1  | K1C10_HUMAN | 1229  | 59020 | 46            | 41                        | 18              | 16                          | 1.83  | Keratin, type I cytoskeletal 10 OS=Homo sapiens GN=KRT10 PE=1 SV=6                                         |
| 2  | K1C9_HUMAN  | 1034  | 62255 | 35            | 32                        | 12              | 11                          | 1.13  | Keratin, type I cytoskeletal 9 OS=Homo sapiens GN=KRT9 PE=1 SV=3                                           |
| 3  | K2C1_HUMAN  | 1009  | 66170 | 38            | 35                        | 11              | 11                          | 0.82  | Keratin, type II cytoskeletal 1 OS=Homo sapiens GN=KRT1 PE=1 SV=6                                          |
| 4  | PDIA1_HUMAN | 532   | 57480 | 28            | 23                        | 12              | 11                          | 0.99  | Protein disulfide-isomerase OS=Homo sapiens GN=P4HB PE=1 SV=3                                              |
| 5  | H2B1C_HUMAN | 462   | 13898 | 11            | 8                         | 4               | 3                           | 1.11  | Histone H2B type 1-C/E/F/G/I OS=Homo sapiens GN=HIST1H2BC PE=1 SV=4                                        |
| 6  | G3P_HUMAN   | 385   | 36201 | 12            | 11                        | 6               | 6                           | 1     | Glyceraldehyde-3-phosphate dehydrogenase OS=Homo sapiens GN=GAPDH PE=1 SV=3                                |
| 7  | PDIA6_HUMAN | 371   | 48490 | 11            | 8                         | 4               | 3                           | 0.25  | Protein disulfide-isomerase A6 OS=Homo sapiens GN=PDIA6 PE=1 SV=1                                          |
| 8  | ACTB_HUMAN  | 338   | 42052 | 16            | 12                        | 7               | 7                           | 0.82  | Actin, cytoplasmic 1 OS=Homo sapiens GN=ACTB PE=1 SV=1                                                     |
| 9  | GRP78_HUMAN | 322   | 72402 | 13            | 9                         | 7               | 5                           | 0.28  | 78 kDa glucose-regulated protein OS=Homo sapiens GN=HSPA5 PE=1 SV=2                                        |
| 10 | ATPB_HUMAN  | 318   | 56525 | 17            | 13                        | 8               | 6                           | 0.47  | ATP synthase subunit beta, mitochondrial OS=Homo sapiens GN=ATP5B PE=1 SV=3                                |
| 11 | CALX_HUMAN  | 287   | 67982 | 11            | 9                         | 6               | 5                           | 0.3   | Calnexin OS=Homo sapiens GN=CANX PE=1 SV=2                                                                 |
| 12 | H4_HUMAN    | 255   | 11360 | 15            | 13                        | 4               | 3                           | 2.34  | Histone H4 OS=Homo sapiens GN=HIST1H4A PE=1 SV=2                                                           |
| 13 | TBA1B_HUMAN | 247   | 50804 | 9             | 7                         | 4               | 3                           | 0.24  | Tubulin alpha-1B chain OS=Homo sapiens GN=TUBA1B PE=1 SV=1                                                 |
| 14 | TBB5_HUMAN  | 231   | 50095 | 9             | 5                         | 5               | 3                           | 0.33  | Tubulin beta chain OS=Homo sapiens GN=TUBB PE=1 SV=2                                                       |
| 15 | GRP75_HUMAN | 200   | 73920 | 7             | 5                         | 3               | 3                           | 0.16  | Stress-70 protein, mitochondrial OS=Homo sapiens GN=HSPA9 PE=1 SV=2                                        |
| 16 | ENPL_HUMAN  | 190   | 92696 | 14            | 8                         | 10              | 6                           | 0.26  | Endoplasmic OS=Homo sapiens GN=HSP90B1 PE=1 SV=1                                                           |
| 17 | H32_HUMAN   | 185   | 15436 | 3             | 3                         | 1               | 1                           | 0.25  | Histone H3.2 OS=Homo sapiens GN=HIST2H3A PE=1 SV=3                                                         |
| 18 | H2A1B_HUMAN | 184   | 14127 | 11            | 10                        | 2               | 2                           | 1.09  | Histone H2A type 1-B/E OS=Homo sapiens GN=HIST1H2AB PE=1 SV=2                                              |
| 19 | RPN2_HUMAN  | 168   | 69355 | 7             | 5                         | 4               | 3                           | 0.17  | Dolichyl-diphosphooligosaccharide--protein glycosyltransferase subunit 2 OS=Homo sapiens GN=RPN2 PE=1 SV=3 |
| 20 | CH60_HUMAN  | 167   | 61187 | 4             | 2                         | 4               | 2                           | 0.13  | 60 kDa heat shock protein, mitochondrial OS=Homo sapiens GN=HSPD1 PE=1 SV=2                                |
| 21 | EST1_HUMAN  | 164   | 62766 | 10            | 7                         | 5               | 4                           | 0.26  | Liver carboxylesterase 1 OS=Homo sapiens GN=CES1 PE=1 SV=2                                                 |
| 22 | RAB1A_HUMAN | 152   | 22891 | 6             | 5                         | 4               | 4                           | 0.86  | Ras-related protein Rab-1A OS=Homo sapiens GN=RAB1A PE=1 SV=3                                              |
| 23 | ANXA2_HUMAN | 150   | 38808 | 3             | 3                         | 2               | 2                           | 0.2   | Annexin A2 OS=Homo sapiens GN=ANXA2 PE=1 SV=2                                                              |
| 24 | ILF2_HUMAN  | 141   | 43263 | 3             | 3                         | 2               | 2                           | 0.18  | Interleukin enhancer-binding factor 2 OS=Homo sapiens GN=ILF2 PE=1 SV=2                                    |
| 25 | HNRH1_HUMAN | 139   | 49484 | 4             | 4                         | 2               | 2                           | 0.16  | Heterogeneous nuclear ribonucleoprotein H OS=Homo sapiens GN=HNRNPH1 PE=1 SV=4                             |
| 26 | ROA2_HUMAN  | 133   | 37464 | 7             | 3                         | 4               | 1                           | 0.1   | Heterogeneous nuclear ribonucleoproteins A2/B1 OS=Homo sapiens GN=HNRNPA2B1 PE=1 SV=2                      |
| 27 | HNRPK_HUMAN | 131   | 51230 | 2             | 2                         | 1               | 1                           | 0.07  | Heterogeneous nuclear ribonucleoprotein K OS=Homo sapiens GN=HNRNPK PE=1 SV=1                              |
| 28 | ATPA_HUMAN  | 129   | 59828 | 8             | 6                         | 5               | 4                           | 0.27  | ATP synthase subunit alpha, mitochondrial OS=Homo sapiens GN=ATP5A1 PE=1 SV=1                              |
| 29 | CAP1_HUMAN  | 129   | 52325 | 14            | 9                         | 8               | 5                           | 0.41  | Adenylyl cyclase-associated protein 1 OS=Homo sapiens GN=CAP1 PE=1 SV=5                                    |
| 30 | ADT3_HUMAN  | 124   | 33073 | 7             | 7                         | 2               | 2                           | 0.24  | ADP/ATP translocase 3 OS=Homo sapiens GN=SLC25A6 PE=1 SV=4                                                 |
| 31 | RPN1_HUMAN  | 120   | 68641 | 9             | 6                         | 6               | 4                           | 0.23  | Dolichyl-diphosphooligosaccharide--protein glycosyltransferase subunit 1 OS=Homo sapiens GN=RPN1 PE=1 SV=1 |

|    |             |     |        |   |   |   |   |      |                                                                                            |
|----|-------------|-----|--------|---|---|---|---|------|--------------------------------------------------------------------------------------------|
| 32 | PLD3_HUMAN  | 110 | 55127  | 6 | 5 | 5 | 4 | 0.3  | Phospholipase D3 OS=Homo sapiens GN=PLD3 PE=1 SV=1                                         |
| 33 | PPIB_HUMAN  | 110 | 23785  | 7 | 6 | 3 | 2 | 0.35 | Peptidyl-prolyl cis-trans isomerase B OS=Homo sapiens GN=PPIB PE=1 SV=2                    |
| 34 | RAP1A_HUMAN | 105 | 21316  | 3 | 3 | 2 | 2 | 0.39 | Ras-related protein Rap-1A OS=Homo sapiens GN=RAP1A PE=1 SV=1                              |
| 35 | COMT_HUMAN  | 103 | 30474  | 3 | 3 | 1 | 1 | 0.12 | Catechol O-methyltransferase OS=Homo sapiens GN=COMT PE=1 SV=2                             |
| 36 | HSPB1_HUMAN | 102 | 22826  | 3 | 3 | 1 | 1 | 0.17 | Heat shock protein beta-1 OS=Homo sapiens GN=HSPB1 PE=1 SV=2                               |
| 37 | EF1A1_HUMAN | 97  | 50451  | 7 | 4 | 3 | 3 | 0.33 | Elongation factor 1-alpha 1 OS=Homo sapiens GN=EEF1A1 PE=1 SV=1                            |
| 38 | ROA1_HUMAN  | 95  | 38837  | 4 | 3 | 4 | 3 | 0.32 | Heterogeneous nuclear ribonucleoprotein A1 OS=Homo sapiens GN=HNRNPA1 PE=1 SV=5            |
| 39 | VDAC3_HUMAN | 91  | 30981  | 6 | 5 | 2 | 2 | 0.26 | Voltage-dependent anion-selective channel protein 3 OS=Homo sapiens GN=VDAC3 PE=1 SV=1     |
| 40 | ALBU_HUMAN  | 88  | 71317  | 6 | 1 | 3 | 1 | 0.05 | Serum albumin OS=Homo sapiens GN=ALB PE=1 SV=2                                             |
| 41 | PDIA3_HUMAN | 87  | 57146  | 6 | 4 | 4 | 4 | 0.29 | Protein disulfide-isomerase A3 OS=Homo sapiens GN=PDIA3 PE=1 SV=4                          |
| 42 | H33_HUMAN   | 84  | 15376  | 1 | 1 | 1 | 1 | 0.25 | Histone H3.3 OS=Homo sapiens GN=H3F3A PE=1 SV=2                                            |
| 43 | HNRPU_HUMAN | 82  | 91269  | 4 | 3 | 2 | 2 | 0.08 | Heterogeneous nuclear ribonucleoprotein U OS=Homo sapiens GN=HNRNPU PE=1 SV=6              |
| 44 | TPP1_HUMAN  | 81  | 61723  | 1 | 1 | 1 | 1 | 0.06 | Tripeptidyl-peptidase 1 OS=Homo sapiens GN=TPP1 PE=1 SV=2                                  |
| 45 | DHE3_HUMAN  | 78  | 61701  | 4 | 4 | 3 | 3 | 0.19 | Glutamate dehydrogenase 1, mitochondrial OS=Homo sapiens GN=GLUD1 PE=1 SV=2                |
| 46 | PPIA_HUMAN  | 77  | 18229  | 4 | 3 | 4 | 3 | 0.78 | Peptidyl-prolyl cis-trans isomerase A OS=Homo sapiens GN=PPIA PE=1 SV=2                    |
| 47 | CALR_HUMAN  | 77  | 48283  | 7 | 5 | 5 | 5 | 0.45 | Calreticulin OS=Homo sapiens GN=CALR PE=1 SV=1                                             |
| 48 | PTBP1_HUMAN | 71  | 57357  | 3 | 3 | 2 | 2 | 0.13 | Polypyrimidine tract-binding protein 1 OS=Homo sapiens GN=PTBP1 PE=1 SV=1                  |
| 49 | ITB2_HUMAN  | 69  | 87976  | 7 | 4 | 5 | 4 | 0.18 | Integrin beta-2 OS=Homo sapiens GN=ITGB2 PE=1 SV=2                                         |
| 50 | CATD_HUMAN  | 67  | 45037  | 3 | 2 | 3 | 2 | 0.17 | Cathepsin D OS=Homo sapiens GN=CTSD PE=1 SV=1                                              |
| 51 | PRDX3_HUMAN | 61  | 28017  | 4 | 2 | 3 | 2 | 0.29 | Thioredoxin-dependent peroxide reductase, mitochondrial OS=Homo sapiens GN=PRDX3 PE=1 SV=3 |
| 52 | COF1_HUMAN  | 60  | 18719  | 2 | 1 | 2 | 1 | 0.21 | Cofilin-1 OS=Homo sapiens GN=CFL1 PE=1 SV=3                                                |
| 53 | RAB7A_HUMAN | 60  | 23760  | 2 | 1 | 2 | 1 | 0.16 | Ras-related protein Rab-7a OS=Homo sapiens GN=RAB7A PE=1 SV=1                              |
| 54 | DECR_HUMAN  | 59  | 36330  | 3 | 2 | 3 | 2 | 0.22 | 2,4-dienoyl-CoA reductase, mitochondrial OS=Homo sapiens GN=DECR1 PE=1 SV=1                |
| 55 | LMNA_HUMAN  | 59  | 74380  | 6 | 3 | 3 | 2 | 0.1  | Prelamin-A/C OS=Homo sapiens GN=LMNA PE=1 SV=1                                             |
| 56 | DHB12_HUMAN | 58  | 34416  | 2 | 2 | 1 | 1 | 0.11 | Very-long-chain 3-oxoacyl-CoA reductase OS=Homo sapiens GN=HSD17B12 PE=1 SV=2              |
| 57 | HNRPM_HUMAN | 57  | 77749  | 3 | 2 | 2 | 2 | 0.1  | Heterogeneous nuclear ribonucleoprotein M OS=Homo sapiens GN=HNRNPM PE=1 SV=3              |
| 58 | RL14_HUMAN  | 53  | 23531  | 1 | 1 | 1 | 1 | 0.16 | 60S ribosomal protein L14 OS=Homo sapiens GN=RPL14 PE=1 SV=4                               |
| 59 | GLYM_HUMAN  | 53  | 56414  | 4 | 3 | 3 | 2 | 0.14 | Serine hydroxymethyltransferase, mitochondrial OS=Homo sapiens GN=SHMT2 PE=1 SV=3          |
| 60 | CLH1_HUMAN  | 53  | 193260 | 7 | 3 | 3 | 1 | 0.02 | Clathrin heavy chain 1 OS=Homo sapiens GN=CLTC PE=1 SV=5                                   |
| 61 | GELS_HUMAN  | 51  | 86043  | 3 | 1 | 3 | 1 | 0.04 | Gelsolin OS=Homo sapiens GN=GSN PE=1 SV=1                                                  |
| 62 | ARP3B_HUMAN | 50  | 48090  | 2 | 1 | 2 | 1 | 0.08 | Actin-related protein 3B OS=Homo sapiens GN=ACTR3B PE=2 SV=1                               |
| 63 | CATB_HUMAN  | 49  | 38766  | 3 | 2 | 3 | 2 | 0.2  | Cathepsin B OS=Homo sapiens GN=CTSB PE=1 SV=3                                              |
| 64 | LMNB1_HUMAN | 48  | 66653  | 4 | 1 | 3 | 1 | 0.06 | Lamin-B1 OS=Homo sapiens GN=LMNB1 PE=1 SV=2                                                |
| 65 | APEX1_HUMAN | 46  | 35931  | 1 | 1 | 1 | 1 | 0.1  | DNA-(apurinic or apyrimidinic site) lyase OS=Homo sapiens GN=APEX1 PE=1 SV=2               |
| 66 | APOC2_HUMAN | 46  | 11277  | 2 | 2 | 2 | 2 | 0.83 | Apolipoprotein C-II OS=Homo sapiens GN=APOC2 PE=1 SV=1                                     |



|     |             |    |        |   |   |   |   |      |                                                                                                                  |
|-----|-------------|----|--------|---|---|---|---|------|------------------------------------------------------------------------------------------------------------------|
| 67  | FACE1_HUMAN | 46 | 55063  | 2 | 2 | 2 | 2 | 0.14 | CAAX prenyl protease 1 homolog OS=Homo sapiens GN=ZMPSTE24 PE=1 SV=2                                             |
| 68  | MYH9_HUMAN  | 46 | 227646 | 3 | 1 | 3 | 1 | 0.02 | Myosin-9 OS=Homo sapiens GN=MYH9 PE=1 SV=4                                                                       |
| 69  | ROA3_HUMAN  | 45 | 39799  | 2 | 1 | 2 | 1 | 0.09 | Heterogeneous nuclear ribonucleoprotein A3 OS=Homo sapiens GN=HNRNPA3 PE=1 SV=2                                  |
| 70  | STML2_HUMAN | 45 | 38624  | 2 | 2 | 1 | 1 | 0.1  | Stomatin-like protein 2, mitochondrial OS=Homo sapiens GN=STOML2 PE=1 SV=1                                       |
| 71  | ESYT1_HUMAN | 42 | 123293 | 2 | 2 | 1 | 1 | 0.03 | Extended synaptotagmin-1 OS=Homo sapiens GN=ESYT1 PE=1 SV=1                                                      |
| 72  | RTN4_HUMAN  | 40 | 130250 | 1 | 1 | 1 | 1 | 0.03 | Reticulon-4 OS=Homo sapiens GN=RTN4 PE=1 SV=2                                                                    |
| 73  | TCPE_HUMAN  | 40 | 60089  | 2 | 1 | 1 | 1 | 0.06 | T-complex protein 1 subunit epsilon OS=Homo sapiens GN=CCT5 PE=1 SV=1                                            |
| 74  | EF1G_HUMAN  | 40 | 50429  | 2 | 1 | 2 | 1 | 0.07 | Elongation factor 1-gamma OS=Homo sapiens GN=EEF1G PE=1 SV=3                                                     |
| 75  | LEG1_HUMAN  | 39 | 15048  | 2 | 1 | 2 | 1 | 0.26 | Galectin-1 OS=Homo sapiens GN=LGALS1 PE=1 SV=2                                                                   |
| 76  | COX2_HUMAN  | 38 | 25719  | 2 | 1 | 1 | 1 | 0.15 | Cytochrome c oxidase subunit 2 OS=Homo sapiens GN=MT-CO2 PE=1 SV=1                                               |
| 77  | 6PGD_HUMAN  | 38 | 53619  | 2 | 1 | 1 | 1 | 0.07 | 6-phosphogluconate dehydrogenase, decarboxylating OS=Homo sapiens GN=PGD PE=1 SV=3                               |
| 78  | ACTN1_HUMAN | 38 | 103563 | 7 | 1 | 6 | 1 | 0.04 | Alpha-actinin-1 OS=Homo sapiens GN=ACTN1 PE=1 SV=2                                                               |
| 79  | HNRPO_HUMAN | 37 | 69788  | 1 | 1 | 1 | 1 | 0.05 | Heterogeneous nuclear ribonucleoprotein Q OS=Homo sapiens GN=SYNCRIP PE=1 SV=2                                   |
| 80  | NUCL_HUMAN  | 37 | 76625  | 2 | 2 | 1 | 1 | 0.05 | Nucleolin OS=Homo sapiens GN=NCL PE=1 SV=3                                                                       |
| 81  | PP1A_HUMAN  | 36 | 38229  | 1 | 1 | 1 | 1 | 0.1  | Serine/threonine-protein phosphatase PP1-alpha catalytic subunit OS=Homo sapiens GN=PPP1CA PE=1 SV=1             |
| 82  | MOGS_HUMAN  | 36 | 92032  | 1 | 1 | 1 | 1 | 0.04 | Mannosyl-oligosaccharide glucosidase OS=Homo sapiens GN=MOGS PE=1 SV=5                                           |
| 83  | SYVC_HUMAN  | 35 | 141642 | 1 | 1 | 1 | 1 | 0.03 | Valine--tRNA ligase OS=Homo sapiens GN=VAR5 PE=1 SV=4                                                            |
| 84  | GANAB_HUMAN | 35 | 107263 | 1 | 1 | 1 | 1 | 0.03 | Neutral alpha-glucosidase AB OS=Homo sapiens GN=GANAB PE=1 SV=3                                                  |
| 85  | ILF3_HUMAN  | 32 | 95678  | 1 | 1 | 1 | 1 | 0.04 | Interleukin enhancer-binding factor 3 OS=Homo sapiens GN=ILF3 PE=1 SV=3                                          |
| 86  | DHX15_HUMAN | 32 | 91673  | 3 | 1 | 2 | 1 | 0.04 | Pre-mRNA-splicing factor ATP-dependent RNA helicase DHX15 OS=Homo sapiens GN=DHX15 PE=1 SV=2                     |
| 87  | TTC24_HUMAN | 31 | 64041  | 3 | 1 | 1 | 1 | 0.06 | Tetratricopeptide repeat protein 24 OS=Homo sapiens GN=TTC24 PE=4 SV=1                                           |
| 88  | SFXN3_HUMAN | 30 | 35823  | 1 | 1 | 1 | 1 | 0.1  | Sideroflexin-3 OS=Homo sapiens GN=SFXN3 PE=1 SV=3                                                                |
| 89  | RBBP4_HUMAN | 30 | 47911  | 1 | 1 | 1 | 1 | 0.08 | Histone-binding protein RBBP4 OS=Homo sapiens GN=RBBP4 PE=1 SV=3                                                 |
| 90  | HNRPL_HUMAN | 30 | 64720  | 1 | 1 | 1 | 1 | 0.06 | Heterogeneous nuclear ribonucleoprotein L OS=Homo sapiens GN=HNRNPL PE=1 SV=2                                    |
| 91  | 1433Z_HUMAN | 30 | 27899  | 2 | 2 | 2 | 2 | 0.29 | 14-3-3 protein zeta/delta OS=Homo sapiens GN=YWHAZ PE=1 SV=1                                                     |
| 92  | XRCC6_HUMAN | 29 | 70084  | 5 | 1 | 3 | 1 | 0.05 | X-ray repair cross-complementing protein 6 OS=Homo sapiens GN=XRCC6 PE=1 SV=2                                    |
| 93  | PRKDC_HUMAN | 28 | 473749 | 3 | 1 | 3 | 1 | 0.01 | DNA-dependent protein kinase catalytic subunit OS=Homo sapiens GN=PRKDC PE=1 SV=3                                |
| 94  | RAB31_HUMAN | 27 | 21897  | 1 | 1 | 1 | 1 | 0.18 | Ras-related protein Rab-31 OS=Homo sapiens GN=RAB31 PE=1 SV=1                                                    |
| 95  | ATP5L_HUMAN | 27 | 11421  | 1 | 1 | 1 | 1 | 0.35 | ATP synthase subunit g, mitochondrial OS=Homo sapiens GN=ATP5L PE=1 SV=3                                         |
| 96  | OST48_HUMAN | 27 | 50940  | 1 | 1 | 1 | 1 | 0.07 | Dolichyl-diphosphooligosaccharide--protein glycosyltransferase 48 kDa subunit OS=Homo sapiens GN=DDOST PE=1 SV=4 |
| 97  | DDX17_HUMAN | 26 | 80906  | 2 | 1 | 2 | 1 | 0.05 | Probable ATP-dependent RNA helicase DDX17 OS=Homo sapiens GN=DDX17 PE=1 SV=2                                     |
| 98  | ARPC4_HUMAN | 24 | 19768  | 1 | 1 | 1 | 1 | 0.19 | Actin-related protein 2/3 complex subunit 4 OS=Homo sapiens GN=ARPC4 PE=1 SV=3                                   |
| 99  | RS27A_HUMAN | 24 | 18296  | 1 | 1 | 1 | 1 | 0.21 | Ubiquitin-40S ribosomal protein S27a OS=Homo sapiens GN=RPS27A PE=1 SV=2                                         |
| 100 | SRSF3_HUMAN | 22 | 19546  | 1 | 1 | 1 | 1 | 0.2  | Serine/arginine-rich splicing factor 3 OS=Homo sapiens GN=SRSF3 PE=1 SV=1                                        |
| 101 | DCD_HUMAN   | 20 | 11391  | 1 | 1 | 1 | 1 | 0.35 | Dermcidin OS=Homo sapiens GN=DCD PE=1 SV=2                                                                       |

|     |             |    |        |   |   |   |   |      |                                                                                                                                            |
|-----|-------------|----|--------|---|---|---|---|------|--------------------------------------------------------------------------------------------------------------------------------------------|
| 102 | HEXB_HUMAN  | 19 | 63527  | 1 | 1 | 1 | 1 | 0.06 | Beta-hexosaminidase subunit beta OS=Homo sapiens GN=HEXB PE=1 SV=3                                                                         |
| 103 | ALDOA_HUMAN | 19 | 39851  | 1 | 1 | 1 | 1 | 0.09 | Fructose-bisphosphate aldolase A OS=Homo sapiens GN=ALDOA PE=1 SV=2                                                                        |
| 104 | CISY_HUMAN  | 16 | 51908  | 3 | 1 | 3 | 1 | 0.07 | Citrate synthase, mitochondrial OS=Homo sapiens GN=CS PE=1 SV=2                                                                            |
| 105 | DJB11_HUMAN | 15 | 40774  | 1 | 1 | 1 | 1 | 0.09 | DnaJ homolog subfamily B member 11 OS=Homo sapiens GN=DNAJB11 PE=1 SV=1                                                                    |
| 106 | MPCP_HUMAN  | 15 | 40525  | 1 | 1 | 1 | 1 | 0.09 | Phosphate carrier protein, mitochondrial OS=Homo sapiens GN=SLC25A3 PE=1 SV=2                                                              |
| 107 | ECHA_HUMAN  | 15 | 83688  | 1 | 1 | 1 | 1 | 0.04 | Trifunctional enzyme subunit alpha, mitochondrial OS=Homo sapiens GN=HADHA PE=1 SV=2                                                       |
| 108 | LPPRC_HUMAN | 15 | 159003 | 3 | 1 | 3 | 1 | 0.02 | Leucine-rich PPR motif-containing protein, mitochondrial OS=Homo sapiens GN=LRPPRC PE=1 SV=3                                               |
| 109 | ODP2_HUMAN  | 14 | 69466  | 1 | 1 | 1 | 1 | 0.05 | Dihydrolipoyllysine-residue acetyltransferase component of pyruvate dehydrogenase complex, mitochondrial OS=Homo sapiens GN=DLAT PE=1 SV=3 |
| 110 | ETHE1_HUMAN | 14 | 28368  | 4 | 2 | 3 | 2 | 0.28 | Persulfide dioxygenase ETHE1, mitochondrial OS=Homo sapiens GN=ETHE1 PE=1 SV=2                                                             |
| 111 | HM13_HUMAN  | 13 | 41747  | 1 | 1 | 1 | 1 | 0.09 | Minor histocompatibility antigen H13 OS=Homo sapiens GN=HM13 PE=1 SV=1                                                                     |
